# Supplementary material for: Anomalous twin boundaries in two dimensional materials
Source: PubMed Central journal article supplement (PMC6125487; doi:10.1038/s41467-018-06074-8), 2018-09-05
Supplement: 41467_2018_6074_MOESM2_ESM.pdf [file 41467_2018_6074_MOESM2_ESM.pdf]

## **Description of Additional Supplementary Files**

File Name: Supplementary Movie 1

Description: Showing where a micromanipulator cleaves the top-most basal planes of graphite to form different bending phenomena observed in an SEM.
